# Supplementary material for: Monitoring ATPase induced pH changes in single proteoliposomes with the lipid-coupled fluorophore Oregon Green 488
Source: Royal Society of Chemistry journal article supplement (doi:10.1039/c7an00215g), 2017-01-01
Supplement: c7an00215g1.pdf [file c7an00215g1.pdf]

Electronic supplementary information

## Monitoring ATPase induced pH changes in single proteoliposomes with the lipid-coupled fluorophore Oregon Green 488

Miriam Schwamborn,<sup>a</sup> Johannes Schumacher,<sup>a</sup> Jeremias Sibold,<sup>a</sup>

Nikolas K. Teiwes,<sup>a</sup> Claudia Steinem<sup>a\*</sup>

Institute of Organic and Biomolecular Chemistry, University of Göttingen, Tammannstr. 2,  
37077 Göttingen, Germany

### Content

1. Expression and purification of TF<sub>0</sub>F<sub>1</sub>-ATPase
2. Characterization of the reconstitution of TF<sub>0</sub>F<sub>1</sub>-ATPase into preformed vesicles
3. Determination of the size distribution of ATPase-liposomes
4. Calculation of ATPase molecules per vesicle
5. ATPase proton pumping activity monitored with the ACMA assay
6. Calculated outer membrane area fraction as a function of vesicle diameter
7. Measurement of proton leakage of vesicles

### 1. Expression and purification of TF<sub>0</sub>F<sub>1</sub>-ATPase

TF<sub>0</sub>F<sub>1</sub>-ATPase was expressed in *E. coli* DK8 harboring the plasmid pTR19-ASDS, encoding for the ATPase of the thermophilic *Bacillus sp.* PS3.<sup>1</sup> Expression and purification was carried according to the protocol of Schenck and coworkers with some minor changes.<sup>2</sup> Briefly, the cells were grown in 2 L terrific broth medium with 100 µg/mL ampicillin at 37 °C to an OD<sub>600</sub> of 1.7. After centrifugation, the cell pellets were resuspended in 50 mM Tris, 0.5 mM EDTA, 1 mg/mL lysozyme, pH 8.0 and incubated for 30 min at 37 °C. MgCl<sub>2</sub> (5 mM) and DNase I buffer (1:1000 (v/v), 5 mg/mL DNase I in 50 % glycerol (w/v), 20 mM Tris, 1 mM MgCl<sub>2</sub>, pH 7.5) was added and stirred for 30 min at room temperature. Subsequently, the suspension was pumped three times through a microfluidizer (Microfluidizer LM10, Microfluidics, Westwood, MA, USA). 250 mM Na<sub>2</sub>SO<sub>4</sub> and 0.7 % sodium cholate (w/v) were added and after stirring for 20 min at room temperature, the sample was centrifuged at 20,000 × *g* at 4 °C for 30 min. The supernatant was discarded and the pellet was resuspended in 20 mM imidazole, 100 mM KCl, 5 mM MgCl<sub>2</sub> and 1 % *n*-dodecyl-β-D-maltoside (DDM) (w/v), pH 7.6 and stirred for 45 min at room temperature. The supernatant resulting from centrifugation at 20,000 × *g* at 4 °C (30 min) was incubated with TALON metal affinity resin (Clontech, Takara Bio Europe, Saint-Germain-en-Laye, France) for 2 h at 4 °C. After washing with 10 column volumes of 20 mM imidazole, 100 mM KCl, 5 mM MgCl<sub>2</sub>, 0.08 % DDM (w/v), pH 7.6, the protein was eluted with 250 mM imidazole, 50 mM KCl, 5 mM MgCl<sub>2</sub>, 0.05% DDM (w/v). After dialysis against 20 mM HEPES, 20 mM NaCl, 5 mM MgCl<sub>2</sub>, pH 7.5, the sample's concentration was increased by performing an anion exchange chromatography (MonoQ 5/50, ÄKTA Purifier 10, GE Healthcare Europe, Freiburg, Germany) starting with 20 mM

HEPES, 20 mM NaCl, 5 mM MgCl<sub>2</sub>, 0.05 % DDM (w/v), pH 7.5 and increasing the NaCl concentration to 1 M. The protein concentration was determined with the Pierce BCA protein assay kit. The ATPase was stored at 4 °C for several weeks. The elution profile of the anion exchange chromatography is shown in Fig. S1 and the SDS-PAGE gel of the peak fractions is shown in Fig. S2.

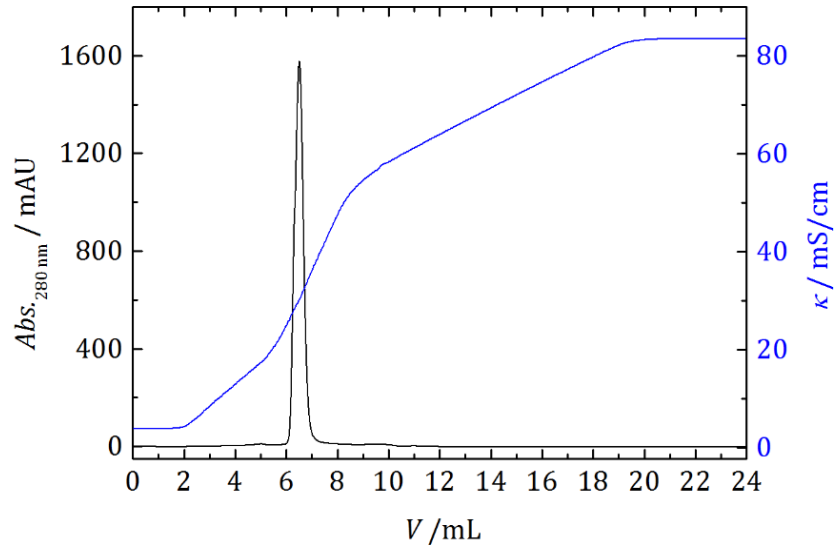

**Fig. S1** Elution profile of TF<sub>o</sub>F<sub>1</sub>-ATPase (Abs.<sub>280 nm</sub>) and the conductivity of the NaCl-gradient, ranging from 20 mM to 1.0 M. The anion exchange chromatography (Mono Q 5/50 column, ÄKTA Purifier, GE Healthcare Life Science) increased the protein concentration to 2.2 μM in a volume of 1.2 mL. The course of the conductance indicates an elution at 30 mS/cm corresponding to a fraction of 30 % buffer B (314 mM NaCl). Buffer A: 20 mM NaCl, 20 mM HEPES, 5 mM MgCl<sub>2</sub>, 1 mM DDM, pH 7.5, buffer B: 1 M NaCl, 20 mM HEPES, 5 mM MgCl<sub>2</sub>, 1 mM DDM, pH 7.5.

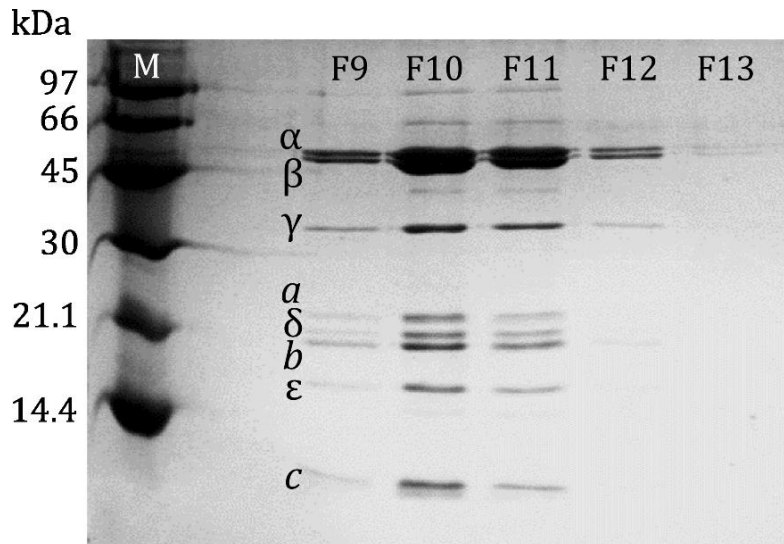

**Fig. S2 (A)** SDS-PAGE gel showing the bands of the eight single units of the TF<sub>o</sub>F<sub>1</sub>-ATPase in the elution fractions F9 to F13 of the anion exchange chromatography ( $V_{\text{elution}} = 6-7.2$  mL). **(B)** Assignment of the TF<sub>o</sub>F<sub>1</sub>-ATPase subunits to the SDS-PAGE gel bands by Suzuki *et al.*

## 2. Characterization of the reconstitution of TF<sub>o</sub>F<sub>1</sub>-ATPase into preformed vesicles

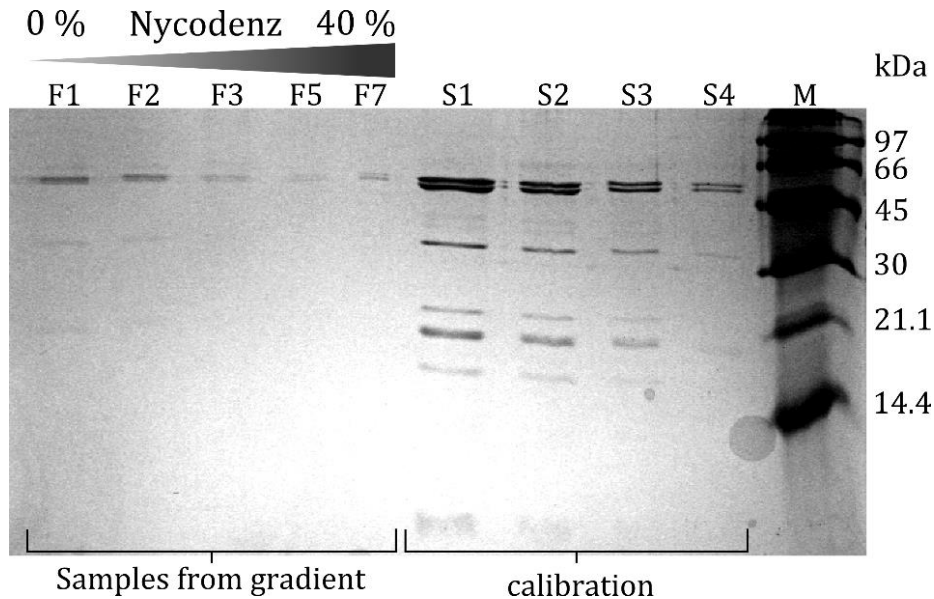

**Fig. S3** The Nycodenz density gradient (0 % to 40 % (w/v)) was prepared in ATPase-buffer (0.5 mM MOPS, 100 mM KCl, 2 mM MgCl<sub>2</sub>, pH 7.3) and divided into seven 20  $\mu$ L fractions for SDS-PAGE analysis. The SDS-PAGE gel from the reconstitution sample with a nominal protein/lipid ratio of 1:40,000 shows the strongest protein band intensities for the fractions of low density, F1–F3, representing reconstituted TF<sub>o</sub>F<sub>1</sub>-ATPase into vesicles of DOPC/POPE/POPS/cholesterol (50:20:10:20). The gel lane corresponding to the fraction of highest density, F7, shows that some amount of protein was not reconstituted into liposomes. S1 to S4 represent the standard samples of 1 mg, 0.5 mg, 0.25 mg and 0.1 mg used for the calibration. For quantification, gray values of the  $\alpha$ ,  $\beta$ , and  $\gamma$ -bands were read out. A calibration curve obtained from the standard S1-S4 allowed assigning the intensities of F1-F3 to the protein mass reconstituted into vesicles.

The reconstitution efficiency was determined for nominal p/l of 1:40,000, 1:20,000 and 1:8,000 by means of a density centrifugation with Nycodenz (Fig. S3).

**Table S1** Characterization of ATPase reconstitution efficiency, starting from different nominal protein/lipid ratios. With increasing nominal p/l of 1:40,000, 1:20,000 and 1:8,000 a saturation of reconstituted protein occurred, resulting in final p/l of 1:29,000, 1:21,000 and 1:19,000.

| Nominal protein/lipid | final protein/lipid | Reconstitution efficiency |
|-----------------------|---------------------|---------------------------|
| 1:40,000              | 1:29,000            | 138 %                     |
| 1:20,000              | 1:21,000            | 95 %                      |
| 1:8,000               | 1:19,000            | 42 %                      |

### 3. Determination of the size distribution of ATPase-liposomes

Dynamic light scattering (DLS) experiments were performed with a Malvern Zetasizer.

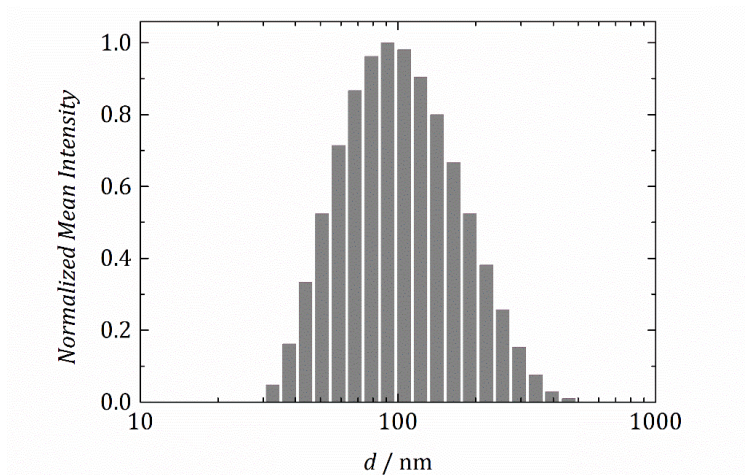

**Fig. S4** Intensity dependent size distribution of ATPase-containing liposomes (DOPC/POPE/POPS/cholesterol (50:20:10:20), nominal p/l = 1:20,000, ATPase-buffer: 0.5 mM MOPS, 100 mM KCl, 2 mM MgCl<sub>2</sub>, pH 7.3) measured by dynamic light scattering (DLS). The proteoliposomes showed a diameter distribution of 35-450 nm, with an intensity-weighted mean diameter of 95 nm (FWHM: 51-191 nm).

### 4. Calculation of ATPase molecules per vesicle

To estimate the average number of TF<sub>0</sub>F<sub>1</sub>-ATPase molecules per vesicle  $N_{\text{ATPase}}$ , the intensity-weighted mean diameter (95 nm, determined by DLS) and the protein/lipid ratio (p/l = 1:20,000, determined by Nycodenz density gradient centrifugation and quantification of lipid concentration) are needed. Furthermore, a bilayer thickness of  $h_{\text{bilayer}} = 4.5 \text{ nm}$ ,<sup>3</sup> an area of a single ATPase of  $a_{\text{protein}} = 20 \text{ nm}^2$ <sup>4</sup> were assumed. The average lipid area  $a_{\text{lipid}} = 0.62 \text{ nm}^2$  of the used lipid mixture was calculated from the values of the CHARMM-GUI Membrane builder (see Table S2).<sup>5</sup>

**Table S2** The average area per lipid of the lipid mixture used was calculated from the individual areas per lipid, which were obtained from the CHARMM-GUI Membrane builder.<sup>5</sup>

| Lipid             | Area/lipid          |
|-------------------|---------------------|
| DOPC (50%)        | 69.7 Å <sup>2</sup> |
| POPE (20%)        | 58.8 Å <sup>2</sup> |
| POPS (10%)        | 60.4 Å <sup>2</sup> |
| Cholesterol (20%) | 40.0 Å <sup>2</sup> |
| Average           | 61.6 Å <sup>2</sup> |

$$N_{\text{ATPase}} = N_{\text{lipid}} \cdot \frac{p}{l}. \quad (\text{S1})$$

The number of lipids per vesicle ( $N_{\text{lipid}}$ ) is calculated with Eq. (S2), with  $A_{\text{lipids}}$  being the total area of lipids in a vesicle and  $a_{\text{lipid}}$  being the average area of a single lipid. For calculation of  $A_{\text{lipids}}$ , the

total protein area ( $A_{\text{proteins}}$ ) is subtracted from the sum of the outer ( $A_{\text{outer surface}}$ ) and the inner ( $A_{\text{inner surface}}$ ) vesicle surface area:

$$N_{\text{lipid}} = \frac{A_{\text{lipids}}}{a_{\text{lipid}}} = \frac{A_{\text{outer surface}} + A_{\text{inner surface}} - A_{\text{proteins}}}{a_{\text{lipid}}}. \quad (\text{S2})$$

The outer vesicles surface is defined by  $A_{\text{outer surface}} = \pi \cdot d_{\text{LUV}}^2$  and the inner surface by  $A_{\text{inner surface}} = \pi \cdot (d_{\text{LUV}} - 2h_{\text{bilayer}})^2$ , with  $d_{\text{LUV}}$  being the diameter of the vesicle and  $h_{\text{bilayer}}$  the bilayer thickness.

The total protein area  $A_{\text{proteins}}$  is calculated from the area fraction of protein  $\chi$  for a protein/lipid ratio of 1:20,000 and the sum of the outer and inner membrane area ( $A_{\text{outer surface}} + A_{\text{inner surface}}$ ):

$$\chi = \frac{a_{\text{protein}}}{a_{\text{protein}} + 20,000 \cdot a_{\text{lipid}}}, \quad (\text{S3})$$

$$A_{\text{proteins}} = \chi \cdot (\pi \cdot d_{\text{LUV}}^2 + \pi \cdot (d_{\text{LUV}} - 2h_{\text{bilayer}})^2). \quad (\text{S4})$$

**Table S3** Results of the calculation of TFOF1-ATPase molecules per 95 nm diameter vesicle. Four ATPase molecules are reconstituted into an average-sized vesicle.

|                                          |        |
|------------------------------------------|--------|
| $A_{\text{outer surface}} / \text{nm}^2$ | 28,450 |
| $A_{\text{inner surface}} / \text{nm}^2$ | 23,240 |
| $\chi$                                   | 0.16 % |
| $A_{\text{proteins}} / \text{nm}^2$      | 83.1   |
| $A_{\text{lipids}} / \text{nm}^2$        | 51,510 |
| $N_{\text{lipid}}$                       | 83,070 |
| $N_{\text{protein}}$                     | 4      |

## 5. ATPase proton pumping activity monitored with the ACMA assay

The ACMA (9-amino-6-chloro-2-methoxyacridine) based ATPase assay was performed on a Jasco FP-6500 spectrofluorometer at 37 °C. To ATPase buffer (0.5 mM MOPS, 100 mM KCl, 2 mM  $\text{MgCl}_2$ , pH 7.3, 860  $\mu\text{L}$ ) 0.9  $\mu\text{M}$  ACMA (3.5  $\mu\text{L}$  of a 0.2 mM stock solution in DMSO) and 100  $\mu\text{L}$  proteoliposomes ( $C_{\text{phospholipid}} \approx 64 \mu\text{M}$ ) were added. The  $\text{K}^+$ -ionophore valinomycin (5.0 nM, 4.4  $\mu\text{L}$  of a 0.9  $\mu\text{M}$  stock solution in DMSO) was supplemented to allow for charge equilibration. ATP addition (1.2 mM, 7.8  $\mu\text{L}$  of a 120 mM stock solution in ATPase buffer, adjusted to pH 7.3) induced proton pumping leading to fluorescence quenching. To collapse the proton gradient, carbonyl cyanide 3-chlorophenylhydrazone (CCCP) (0.4  $\mu\text{M}$ , 1.6  $\mu\text{L}$  of a 0.2 mM stock solution in DMSO) was added. ACMA was excited at  $\lambda_{\text{ex}} = 410 \text{ nm}$  and emission was recorded at  $\lambda_{\text{em}} = 490 \text{ nm}$ . The fluorescence intensity was normalized to the intensity obtained immediately after ATP addition ( $t = 0 \text{ s}$ ). A characteristic result of an ACMA assay clearly demonstrating the activity of reconstituted ATPase is shown in Fig. S5.

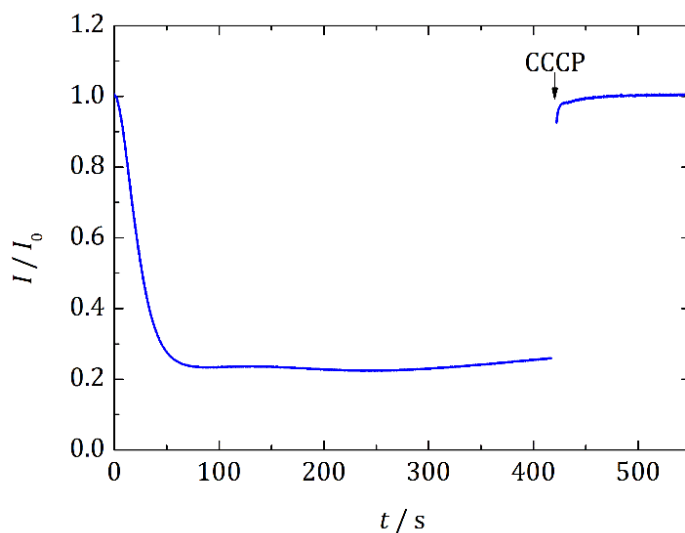

**Fig. S5** ACMA-based activity measurement of ATPase-containing liposomes (DOPC/POPE/POPS/cholesterol (50:20:10:20), nominal p/l = 1:20,000) at 37 °C. ATPase buffer (0.5 mM MOPS, 100 mM KCl, 2 mM MgCl<sub>2</sub>, pH 7.3) was supplemented with 0.9 μM ACMA and 5 nM valinomycin. ATP addition (1.2 mM,  $t = 0$  s) led to a significant quenching of fluorescence intensity. CCCP addition (0.4 μM) collapsed the proton gradient, resulting in a restoration of fluorescence intensity to the initial value.  $\lambda_{ex/em} = 410/490$  nm.

## 6. Calculated outer membrane area fraction as a function of vesicle diameter

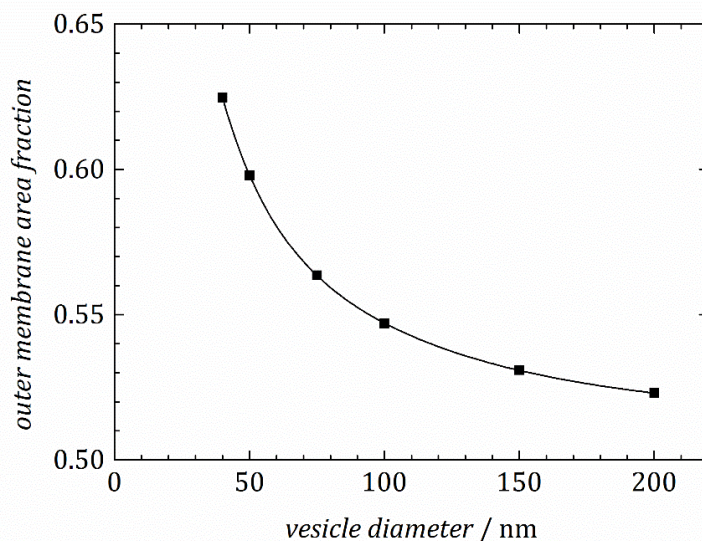

**Fig. S6** Calculated outer membrane area fraction as a function of vesicle diameter, assuming a bilayer thickness of 4.5 nm.<sup>3,6</sup> The relative amount of fluorescence intensity emitted from the OG488-DHPE of the outer vesicles membrane leaflet, correlates with the area fraction of the outer vesicle surface. For a 100 nm diameter vesicle the outer membrane area is approx. 55 % of the total area, which is in good agreement with the calibration curve's minimum of 59 % remaining intensity.

## 7. Measurement of proton leakage of vesicles

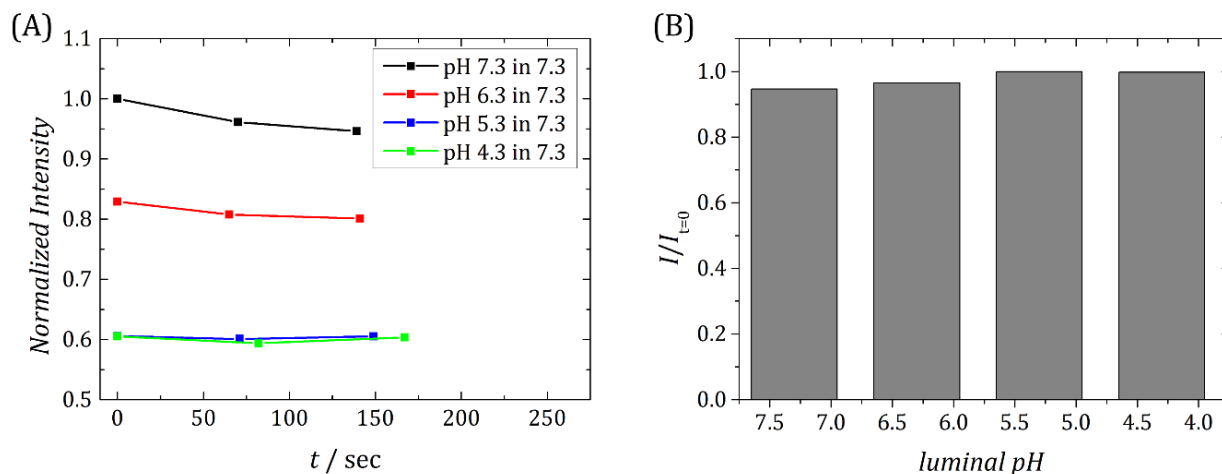

**Fig. S1. (A)** To assess proton permeability, the fluorescence intensities of OG488 DHPE-doped vesicles with luminal pH-values of 7.3 (black), 6.3 (red), 5.3 (blue) and 4.3 (green) were observed in an external buffer of pH 7.3. All intensities were normalized to the fluorescence intensity at  $t = 0$  s of the vesicles with an internal pH of 7.3. The small intensity decrease of the sample with luminal pH of 7.3 is a result of fluorescence bleaching. **(B)** Intensity ratios measured at 150 s ( $I$ ) normalized to the initial intensity at  $t = 0$  s ( $I_{t=0}$ ). No significant intensity changes are observed within this time window of observation supporting that proton leakage can be excluded.

## References

1. T. Suzuki, H. Ueno, N. Mitome, J. Suzuki and M. Yoshida, *J. Biol. Chem.*, 2002, **277**, 13281.
2. S. Schenck, S. M. Wojcik, N. Brose and S. Takamori, *Nat. Neurosci.*, 2009, **12**, 156.
3. J. Gallova, D. Uhrikova, A. Islamov, A. Kuklin and P. Balgavy, *Gen. Physiol. Biophys.*, 2004, **23**, 113.
4. M. Tutus, F. F. Rossetti, E. Schneck, G. Fragneto, F. Forster, R. Richter, T. Nawroth and M. Tanaka, *Macromol. Biosci.*, 2008, **8**, 1034.
5. [http://www.charmm-gui.org/?doc=input/membrane\\_only&step=1](http://www.charmm-gui.org/?doc=input/membrane_only&step=1) (last accessed April 2017).
6. M. Alwarawrah, J. Dai and J. Huang, *J. Phys. Chem. B*, 2010, **114**, 7516.
